# THE AMERICAN PSYCHIATRIC ASSOCIATION

1000 Wilson Blvd., Suite 1825, Arlington, VA 22209-3901  
(888) 357-7924 (toll-free inside the U.S. and Canada) / (703) 907-7300  
web site: [www.psychiatry.org](http://www.psychiatry.org) • e-mail: [apa@psych.org](mailto:apa@psych.org)

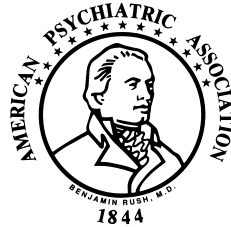

## OFFICERS 2013–2014

|                 |                            |
|-----------------|----------------------------|
| President       | Jeffrey A. Lieberman, M.D. |
| President-Elect | Paul Summergrad, M.D.      |
| Treasurer       | David Fassler, M.D.        |
| Secretary       | Maria A. Oquendo, M.D.     |

## ASSEMBLY

|               |                        |
|---------------|------------------------|
| Speaker       | Melinda L. Young, M.D. |
| Speaker-Elect | Jenny L. Boyer, M.D.   |
| Recorder      | Glenn A. Martin, M.D.  |

## MEDICAL DIRECTOR'S OFFICE

Medical Director and CEO    Saul Levin, M.D., M.P.A.

## BOARD OF TRUSTEES

|                              |                         |                             |
|------------------------------|-------------------------|-----------------------------|
| Jeffrey Akaka, M.D.          | Jeffrey Geller, M.D.    | Phillip M. Murray, M.D.     |
| Christina J. Arredondo, M.D. | Marc David Graff, M.D.  | James E. Nining, M.D.       |
| Carol A. Bernstein, M.D.     | James A. Greene, M.D.   | John M. Oldham, M.D.        |
| Lara J. Cox, M.D., M.S.      | Dilip V. Jeste, M.D.    | Uyen-Khanh Quang-Dang, M.D. |
| Brian Crowley, M.D.          | Judith F. Kashtan, M.D. | Gail E. Robinson, M.D.      |
| Anita S. Everett, M.D.       | Molly K. McVoy, M.D.    | Erik R. Vanderlip, M.D.     |

## PUBLISHER

Rebecca D. Rinehart

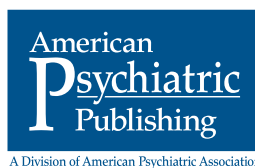

THE AMERICAN PSYCHIATRIC ASSOCIATION  
Chairpersons of Councils, Commissions, Committees, and Task Forces

Standing Committees

**Bylaws**

Rebecca W. Brendel, M.D., J.D.

**Elections**

Barry K. Herman, M.D.

**Ethics**

Richard D. Milone, M.D.

**Finance and Budget**

Alan F. Schatzberg, M.D.

*Audit*

David Fassler, M.D.

*Investment Oversight*

Larry R. Faulkner, M.D.

**Joint Reference**

Paul Summergrad, M.D.

**Membership**

Jonathan M. Amiel, M.D.

**Nominating**

Dilip V. Jeste, M.D.

**Tellers**

Hind Benjelloun, M.D.

**Council on Addiction Psychiatry**

Frances R. Levin, M.D.

**Council on Advocacy and Government Relations**

Robert Paul Cabaj, M.D.

*Advocacy and Litigation Funding*

Renee L. Binder, M.D.

**Council on Children, Adolescents, and Their Families**

Louis J. Kraus, M.D.

*Agnes Purcell McGavin Award*

Christopher J. McDougle, M.D.

*Blanche F. Ittleson Research Award*

Matthew W. State, M.D.

**Council on Communications**

Jeffrey A. Borenstein, M.D.

**Council on Geriatric Psychiatry**

Robert P. Roca, M.D.

**Council on Healthcare Systems and Financing**

Harsh K. Trivedi, M.D.

*Reimbursement for Psychiatric Care*

Bruce J. Schwartz, M.D.

*RBRVS, Codes and Reimbursement*

Ronald M. Burd, M.D.

**Council on Medical Education and Lifelong Learning**

Richard F. Summers, M.D.

*APA Public Psychiatry Fellowship Selection Committee*

Christina V. Mangurian, M.D.

*APA/SAMHSA Minority Fellowship Selection and Advisory*

Altha J. Stewart, M.D.

*Scientific Program*

Philip R. Muskin, M.D.

*Scientific Program Committee of the Institute on Psychiatric Services*

Hunter L. McQuiston, M.D.

*Task Force to Update the Ethics Annotations*

Laura W. Roberts, M.D.

*Vestermark Award Committee*

Joel Yager, M.D.

**Council on Minority Health and Health Disparities**

Sandra C. Walker, M.D.

**Council on Psychiatry And Law**

Steven K. Hoge, M.D.

*Isaac Ray/Human Rights Award*

Steven K. Hoge, M.D.

*Judicial Action*

Paul S. Appelbaum, M.D.

*Manfred S. Guttmacher Award*

David A. Lowenthal, M.D.

**Council on Psychosomatic Medicine  
(Consultation Liaison Psychiatry)**

Joel E. Dimsdale, M.D.

**Council on Quality Care**

Joel Yager, M.D.

*Electronic Health Records*

Steven Roy Daviss, M.D.

*Steering Committee on Practice Guidelines*

Michael J. Vergare, M.D.

**Council on Research**

Dwight L. Evans, M.D.

*Psychiatric Dimensions of Disasters*

Charles R. Marmar, M.D.

*Research Awards*

Timothy B. Walsh, M.D.

*Task Force to Revise the Practice of Electroconvulsive Therapy*

Sarah H. Lisanby, M.D.

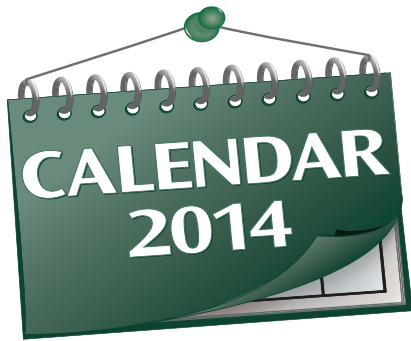

For free listing of your organization's official annual or regional meeting, please send us the following information: sponsor, location, inclusive dates, type and number of continuing education credits (if available), and the name, address, and telephone number of the person or group to contact for more information. In order for an event to appear in our listing, all notices and changes must be received at least 6 months in advance of the meeting and should be addressed to:

**Calendar, American Journal of Psychiatry, 1000 Wilson Boulevard, Suite 1825, Arlington, VA 22209-3901, [swestrade@psych.org](mailto:swestrade@psych.org) (e-mail).**

Because of space limitations, only listings of meetings of the greatest interest to Journal readers may be included.

## MARCH

**March 12–15**, 43rd Annual Meeting of the American Association of Directors of Psychiatric Residency Training, Tucson, Ariz. [www.aadprt.org](http://www.aadprt.org) (web site).

## MAY

**May 3–7**, 167th Annual Meeting, American Psychiatric Association, New York, NY. Contact: APA Annual Meetings Dept., 1000 Wilson Blvd,

Suite 1825, Arlington, VA 22209; (703) 907-7815 (tel); <http://www.psych.org/learn/annual-meeting> (web site).

## JULY

**July 8–13**, 28th International Congress of Applied Psychology, Palais de Congrès de Paris, France. Contact [exh@icap2014.com](mailto:exh@icap2014.com) (e-mail), [www.icap2014.com](http://www.icap2014.com) (web site).

**July 30–August 1**, 39th Annual University of Colorado Psychiatry Con-

ference, The Gant, Aspen, featuring Glenn Gabbard, M.D., and John Gunderson, M.D., *Good Psychiatric Management*. Contact: Joelynn Jewell, [Joelynn.Jewell@ucdenver.edu](mailto:Joelynn.Jewell@ucdenver.edu) (e-mail), (303) 724 7401 (tel) for information and brochure.

## OCTOBER

**October 30–November 2**, 66th Institute on Psychiatric Services, San Francisco, CA. [www.psychiatry.org/ips](http://www.psychiatry.org/ips) (web site).

# An essential digital companion to the DSM-5™

*NEW! – Now Spanish language supported!*

## DSM-5™ Diagnostic Criteria Mobile App

American Psychiatric Association

The **DSM-5™ Diagnostic Criteria Mobile App** is designed to help mental health practitioners, researchers and students fully integrate the new DSM criteria and codes into their practice and study. Users have full offline access to all of the criteria sets as well as online access to supporting videos, commentary and resources. Powerful search and customization tools aid and enhance assessment of symptom presentations in a variety of clinical and administrative settings. It features:

- Access to the complete DSM-5 diagnostic criteria sets on your phone and tablet
- Up to date access to ICD-9-CM and ICD-10-CM codes for clinical and administrative use
- Video commentary from the DSM-5 task force members highlighting changes from DSM-IV to DSM-5
- Robust disorder, acronym, code and symptom search functionality
- Bookmarking allows customization of the criteria sets most commonly referenced

Available for both iOS and Android compatible devices through the iTunes store and Android market.

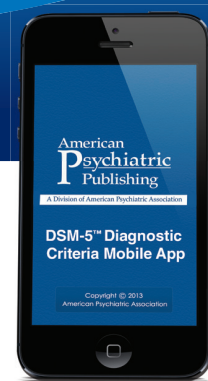

As the DSM-5™ Diagnostic Criteria Mobile App is only available for sale through the iTunes and Android stores, it is not possible for us to extend our traditional APA Member or APA Member-in-Training discounts on the purchase of this product.

# There's So Much More to AJP Than Meets the Page!

Visit *The American Journal of Psychiatry's* website on PsychiatryOnline for the following features!

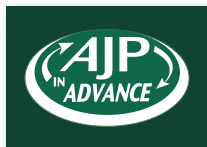

## AJP in Advance

**The very latest research advances!**

At **AJP in Advance**, you can discover the following before their appearance in print:

### **Maternal Influenza Exposure and Bipolar Disorder in Adult Offspring**

Substantial research has documented an association between prenatal exposure to infection and schizophrenia, and this study found serologically documented maternal influenza exposure was also associated with a fivefold greater risk of bipolar disorder, but only with psychotic features. These results may suggest that prenatal influenza is a risk factor for psychosis rather than for a specific psychotic disorder.

### **Excess Mortality in Depression in General Versus Patient Communities**

The mechanisms linking depression to mortality were found to be related to biological dysregulations or lifestyle factors rather than disease specific in this unprecedented meta-analysis of 247 studies—which included 105,986 depressed and 578,503 nondepressed participants from 31 countries.

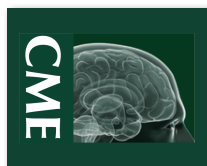

## AJP CME

Three articles in this issue form the basis of a short course with questions that can be answered for up to 1 *AMA PRA Category 1 Credit™* each by visiting <http://psychiatryonline.org/cme.aspx> and clicking on the “**American Journal of Psychiatry**” tab.

CME credit is issued only online, and a paid subscription to AJP CME course program is required. This month's courses appear on pages 377–380.

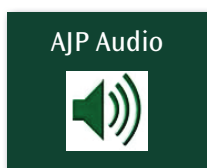

## Have You Heard?

With AJP Audio you can listen to highlights of this issue. This month, Deputy Editor Susan Schultz discusses psychiatric symptoms in prion disease, antidepressant-induced liver injury, the effects of fluoxetine on the serotonin transporter in juvenile monkeys, a comparison of intensive and standard cognitive therapy for PTSD, a trial of schema therapy for personality disorders, the occurrence of violence in relation to the symptoms and treatment of schizophrenia, and electronic personal health records for patients with serious mental illness and comorbid medical conditions.

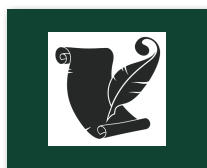

## Revisit the field's rich history!

**75 years ago this month**

The “Total Push” Method in the Treatment of Chronic Schizophrenia

Effects of Vitamin B1 in Schizophrenia

Mental Disorders in Triplets

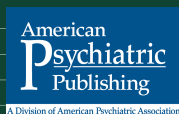

[ajp.psychiatryonline.org](http://ajp.psychiatryonline.org)

[www.appi.org](http://www.appi.org) • 1-800-368-5777 • Fax: 703-907-1091 • Email: [appi@psych.org](mailto:appi@psych.org)

Priority Code AP11230

# The Residents' JOURNAL

**The Residents' JOURNAL**  
a publication of  
The American Journal of Psychiatry

January 2014      Volume 9      Issue 1

**Inside**

- 2 **The Judicial-Mental Health Partnership: Opportunities and Risks**  
Katherine C. Michaelsen, M.D.
- 5 **A Relevant Review of Violence Risk for the Psychiatric Trainee**  
Tobias D. Wasser, M.D.
- 8 **Outpatient Commitment and Statutory Law**  
Ryan W. Blum, M.D.
- 10 **Suicide Risk Assessment: A Clinical and Legal Issue**  
Rajiv Radhakrishnan, M.B.B.S., M.D., Samuel T. Wilkinson, M.D.
- 13 **Torture, Solitary Confinement, and the Legal Disparities**  
Scott Alan Gershan, M.D.
- 14 **Psychiatry and Its Importance**  
Barinder Singh, M.D.
- 16 **Issues in Informed Consent and Serious Mental Illness From the Perspective of an Institutional Review Board Member**  
Simha E. Ravven, M.D.
- 18 **Test Your Knowledge**
- 19 **Author Information and Upcoming Themes**

**In This Issue**



This issue of the *Residents' Journal* includes articles related to the topic of forensic psychiatry and psychiatry and the law. In her article, Katherine C. Michaelsen, M.D., focuses on the link between the mental health system and the criminal justice system, pointing out that law enforcement is often the first line of interception for many individuals with severe mental illness. Tobias D. Wasser, M.D., discusses how psychiatric trainees can learn to identify risk factors that may increase a mentally ill individual's risk for violence. Ryan W. Blum, M.D., provides important data regarding U.S. statutes pertaining to outpatient commitment. Rajiv Radhakrishnan, M.B.B.S., M.D., and Samuel T. Wilkinson, M.D., address the clinical and legal issue of suicide risk assessment. Last, Scott Alan Gershan, M.D., offers his commentary on torture, solitary confinement, and legal disparities.

|                                             |                                                                                                                                            |
|---------------------------------------------|--------------------------------------------------------------------------------------------------------------------------------------------|
| Editor-in-Chief<br>Arshya Vahabzadeh, M.D.  | Editors Emeriti<br>Sarah B. Johnson, M.D.<br>Molly McVoy, M.D.<br>Joseph M. Cerimele, M.D.<br>Sarah M. Fayad, M.D.<br>Monifa Seawell, M.D. |
| Deputy Editor<br>Misty Richards, M.D., M.S. | Staff Editor<br>Angela Moore                                                                                                               |
| Associate Editor<br>David Hsu, M.D.         |                                                                                                                                            |
| Guest Section Editor<br>Tobias Wasser, M.D. |                                                                                                                                            |

**Editor-in-Chief**  
Arshya Vahabzadeh, M.D.  
(MGH/Harvard)

**Deputy Editor**  
Misty Richards, M.D., M.S.  
(UCLA)

**Associate Editor**  
David Hsu, M.D.  
(McLean/Harvard)

*The Residents' Journal* accepts manuscripts authored by medical students, resident physicians, and fellows. To submit your paper, please visit the manuscript submission site at [mc.manuscriptcentral.com/appi-ajp](http://mc.manuscriptcentral.com/appi-ajp) and either create an account or use your existing account. For manuscript type, select "Residents." Then follow the instructions to upload your manuscript. Residents who are interested in participating as Guest Section Editors should e-mail *The Residents' Journal* Editor-in-Chief Arshya Vahabzadeh at [vahab1789@gmail.com](mailto:vahab1789@gmail.com).

*The Residents' Journal* is sent free-of-charge to all psychiatry residents. Anyone interested in being included on the distribution list should contact Angela Moore, *The Residents' Journal* staff editor at [ajp@psych.org](mailto:ajp@psych.org) with "Subscribe to Residents' Journal" in the subject line.

To access the complete Residents' Journal archives, visit [ajp.psychiatryonline.org/residents\\_journal.aspx](http://ajp.psychiatryonline.org/residents_journal.aspx)

## Contents

- A5 Editorial Board  
A7 Highlights of this issue

## Editorials

- 91 **Psychological medicine and the future of psychiatry**  
M. Sharpe
- 93 **Psychiatric diagnosis: impersonal, imperfect and important**  
N. Craddock and L. Mynors-Wallis
- 95 **Body dysmorphic disorder – in 100 words**  
David Veale
- 96 **Disorders of gender identity: what to do and who should do it?**  
J. Barrett

## Review article

- 98 **Interventions for reducing benzodiazepine use in older people: meta-analysis of randomised controlled trials**  
R. L. Gould, M. C. Coulson, N. Patel, E. Highton-Williamson and R. J. Howard

## Papers

- 108 **Analysis of copy number variations at 15 schizophrenia-associated loci**  
E. Rees, J. T. R. Walters, L. Georgieva, A. R. Isles, K. D. Chambert, A. L. Richards, G. Mahoney-Davies, S. E. Legge, J. L. Moran, S. A. McCarroll, M. C. O'Donovan, M. J. Owen and G. Kirov
- 115 **Effects of a novel schizophrenia risk variant rs7914558 at *CNNM2* on brain structure and attributional style**  
E. J. Rose, A. Hargreaves, D. Morris, C. Fahey, D. Tropea, E. Cummings, C. Caltagirone, P. Bossù, C. Chiapponi, F. Piras, G. Spalletta, M. Gill, A. Corvin and G. Donohoe
- 122 **The developmental trajectory of bipolar disorder**  
A. Duffy, J. Horrocks, S. Doucette, C. Keown-Stoneman, S. McCloskey and P. Grof
- 129 **Corpus callosum changes in euthymic bipolar affective disorder**  
A. J. Lloyd, H. E. Ali, D. Nesbitt, P. B. Moore, A. H. Young and I. N. Ferrier
- 137 **Cortisol awakening response and subsequent depression: prospective longitudinal study**  
R. Carnegie, R. Araya, Y. Ben-Schlomo, V. Glover, T. G. O'Connor, K. J. O'Donnell, R. Pearson and G. Lewis
- 144 **Moderators of remission with interpersonal counselling or drug treatment in primary care patients with depression: randomised controlled trial**  
M. Menchetti, P. Rucci, B. Bortolotti, A. Bombi, P. Scocco, H. C. Kraemer, D. Berardi and the DEPICS group
- 150 **Beckett and psychiatry – in 100 words**  
Matthew Broome, Jonathan Heron and Elizabeth Barry

- 151 **Psychiatric characteristics in transsexual individuals: multicentre study in four European countries**  
G. Heylens, E. Elaut, B. P. C. Kreukels, M. C. S. Paap, S. Cerwenka, H. Richter-Appelt, P. T. Cohen-Kettenis, I. R. Haraldsen and G. De Cuyper

- 156 **On Nikolai Gogol's *Diary of a Madman* – reflection**  
Rachel Upthegrove

- 157 **Mental health and psychological support in UK armed forces personnel deployed to Afghanistan in 2010 and 2011**  
N. Jones, P. Mitchell, J. Clack, M. Fertout, N. T. Fear, S. Wessely and N. Greenberg

- 162 **Voices – poems by doctors**  
Julian Leff

## Columns

- 163 Correspondence  
164 Corrections  
165 Book reviews  
168 Contents of *Advances in Psychiatric Treatment*  
169 Contents of the *American Journal of Psychiatry*  
170 From the Editor's desk

## Cover picture

*The Sleeping Prince* (before 1984). Graham G. (dates unknown). Painted ceramic, 16.5 × 14 cm

Edward Adamson (1911–1996) was a British artist, pioneer of using art as therapy, and the creator of the Adamson Collection. The Adamson Collection is one of the major international collections of art objects by people with mental health issues. We know from Adamson's book, *Art as Healing* (1984), that the creator of this object, Graham G, found personal relationships difficult. Adamson suggests he was happier in the fantasy world of gnomes, pixies, castles and monsters, which he created during his sessions at Adamson's London studio. The Collection has about 15 of Graham G's ceramics and one painting. In this one, the Sleeping Prince has a garland of red roses around his neck (now faded), a climbing plant growing across his face – a recurring motif, which Adamson called 'tendrils of fantasy' – and a golden eagle emerging from his forehead.

Adamson Festival 2014: <http://www.slam.nhs.uk/about-us/art-and-history/the-adamson-collection>

David O'Flynn. SLAM Consultant Psychiatrist & Adamson Collection Trust Chair.

*Courtesy of Adamson Collection Trust*

We are always looking for interesting and visually appealing images for the cover of the *Journal* and would welcome suggestions or pictures, which should be sent to Dr Allan Beveridge, British Journal of Psychiatry, 21 Prescot Street, London E1 8BB, UK or [bjp@rcpsych.ac.uk](mailto:bjp@rcpsych.ac.uk).

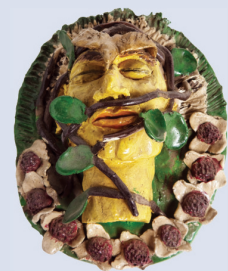

Source: http://ajp.psychiatryonline.org/doi/suppl/10.1176/ajp.2014.171.issue-3/suppl_file/front.pdf
