# THE AMERICAN JOURNAL OF PSYCHIATRY

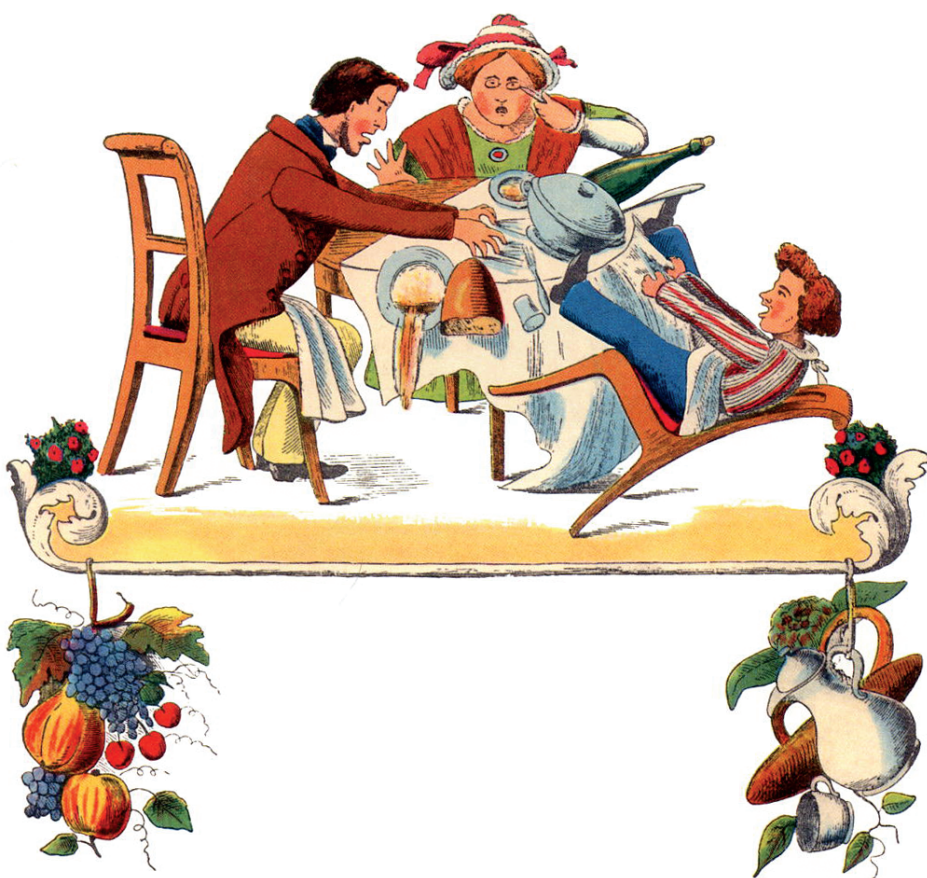

*See the naughty restless child  
Growing still more rude and wild.  
Till his chair falls over quite.  
Philip screams with all his might.*

- ◀ Emotion Dysregulation in Attention Deficit Hyperactivity Disorder  
Philip Shaw, M.B.B.Ch., Ph.D., et al. 276
- Fluoxetine Administered to Juvenile Monkeys: Effects on the Serotonin Transporter and Behavior  
Stal Saurav Shrestha, B.A., et al. 323
- Association of Violence With Emergence of Persecutory Delusions in Untreated Schizophrenia  
Robert Keers, Ph.D., et al. 332
- Randomized Trial of an Electronic Personal Health Record for Patients With Serious Mental Illnesses  
Benjamin G. Druss, M.D., M.P.H., et al. 360

March 2014

Volume 171 • Number 3

Official Journal of the  
AMERICAN PSYCHIATRIC ASSOCIATION

[ajp.psychiatryonline.org](http://ajp.psychiatryonline.org)
