# THE AMERICAN JOURNAL OF PSYCHIATRY

## En este número

A12

### Perspectivas

#### Editoriales

- 249** **Terapia intensiva alternativa para TEPT**  
Marylene Cloitre
- 252** **Modelo en primates del efecto del tratamiento con antidepresivos en la infancia**  
David A. Brent, Judy Cameron, y David A. Lewis
- 256** **Tratamiento de la psicosis y evaluación de riesgo de violencia**  
Matthew M. Large
- 259** **Mayor adherencia al tratamiento para personas con enfermedades mentales graves utilizando los registros personales de salud**  
John C. Fortney y Richard R. Owen

#### Comentario

- 262** **Un consejo sobre la ketamina**  
Alan F. Schatzberg

#### Tratamiento en Psiquiatría

- 265** **Síntomas comportamentales y psiquiátricos en las enfermedades priónicas**  
Andrew Thompson, Angus Mackay, Peter Rudge, Ana Lukic, Marie-Claire Porter, Jessica Lowe, John Collinge, y Simon Mead

#### Imágenes en Psiquiatría

- 275** **Cuando se consideraba que los trastornos afectivos emanaban del corazón: El papiro Ebers**  
Rami Bou Khalil y Sami Richa

#### Resúmenes y Reseñas

- 276** **Desregulación de las emociones en el trastorno de déficit de atención e hiperactividad**  
Phillip Shaw, Argyris Stringaris, Joel Nigg, y Ellen Leibenluft

## Nuevas Investigaciones

### Artículos

- 294** **Un ensayo aleatorizado controlado de terapia cognitiva intensiva por siete días y terapia cognitiva semanal estándar para TEPT y terapia de apoyo centrada en las emociones**  
Anke Ehlers, Ann Hackmann, Nick Grey, Jennifer Wild, Sheena Liness, Idit Albert, Alicia Deale, Richard Stott, y David M. Clark
- 305** **Resultados de un ensayo aleatorizado controlado multicéntrico de la efectividad clínica de la terapia de esquemas para los trastornos de personalidad**  
Lotte L.M. Bamelis, Silvia M.A.A. Evers, Philip Spinhoven, y Arnoud Arntz
- 323** **Fluoxetina administrada a monos juveniles: efectos sobre el comportamiento y el transportador de serotonina**  
Stal Saurav Shrestha, Eric E. Nelson, Jeih-San Liow, Robert Gladding, Chul Hyoung Yoo, Pam L. Noble, Cheryl Morse, Ioline D. Henter, Jeremy Kruger, Bo Zhang, Stephen J. Suomi, Per Svenningsson, Victor W. Pike, James T. Winslow, Ellen Leibenluft, Daniel S. Pine, y Robert B. Innis
- 332** **Asociación de la violencia con la aparición de ideas delirantes persecutorias en esquizofrenia no tratada**  
Robert Keers, Simone Ullrich, Bianca L. DeStavola, y Jeremy W. Coid
- 340** **Mega-análisis multicéntrico con morfometría basada en vóxel de escáneres cerebrales estructurales en trastorno obsesivo compulsivo**  
Stella J. de Wit, Pino Alonso, Lizanne Schweren, David Mataix-Cols, Christine Lochner, José M. Menchón, Dan J. Stein, Jean-Paul Fouche, Carlos Soriano-Mas, Joao R. Sato, Marcelo Q. Hoexter, Damiaan Denys, Takashi Nakamae, Seiji Nishida, Jun Soo Kwon, Joon Hwan Jang, Geraldo F. Busatto, Narcís Cardoner, Danielle C. Cath, Kenji Fukui, Wi Hoon Jung, Sung Nyun Kim, Euripedes C. Miguel, Jin Narumoto, Mary L. Phillips, Jesus Pujol, Peter L. Remijnse, Yuki Sakai, Na Young Shin, Kei Yamada, Dick J. Veltman, y Odile A. van den Heuvel
- 350** **Revisión de datos de ligamiento en esquizofrenia en el banco de datos del NIMH: Re-análisis de datos regularizados de múltiples estudios**  
Veronica J. Vieland, Kimberly A. Walters, Thomas Lehner, Marco Azaro, Kathleen Tobin, Yungui Huang, y Linda M. Brzustowicz

**360 Ensayo aleatorizado de un registro personal de salud electrónico para pacientes con enfermedades mentales graves**

Benjamin G. Druss, Xu Ji, Gretl Glick, y Silke A. von Esenwein

**Comunicados y Actualizaciones**

**Cartas al Editor**

**369** Desarrollo y curso de los déficits cognitivos desde el período premórbido hasta el período post-inicio en esquizofrenia

Cuestiones de gestión durante el embarazo en mujeres con trastorno bipolar

**Reseñas Bibliográficas**

**372** Working With Families in Medical Settings: A Multidisciplinary Guide for Psychiatrists and Other Health Professionals (Trabajando con familias en contextos médicos: Una guía multidisciplinar para psiquiatras y otros profesionales de la salud)

Clinical Guide to Depression and Bipolar Disorder: Findings From the Collaborative Depression Study (Guía Clínica de depresión y trastorno bipolar: Hallazgos del estudio colaborativo de depresión)

Comprehensive Care for Complex Patients: The Medical-Psychiatric Coordinating Physician Model (Cuidado integral para pacientes complejos: el

modelo coordinante médico-psiquiátrico para médicos)

Management of Treatment-Resistant Major Psychiatric Disorders (Manejo de trastornos psiquiátricos mayores resistentes al tratamiento)

**376 Libros Recibidos**

**Otros Temas de Interés**

**377 Educación Médica Continuada**

**A5 Directivos de la American Psychiatric Association**

**A7 Calendario**

**A11 Contenidos del *British Journal of Psychiatry***

**Cubierta**

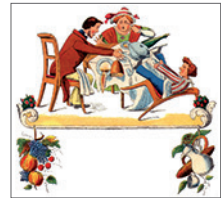

**Audio**

artículo en AJP Audio: archivo .mp3 descargable de [ajp.psychiatryonline.org](http://ajp.psychiatryonline.org)

**Guías clínicas**

este artículo ofrece guías clínicas (ver pagina "En este Número" o al final del artículo)

**EMC**

existe un curso en línea que cubre los contenidos de este artículo para los suscriptores del programa de cursos de EMC del AJP

**Editorial**

este artículo se discute en uno de los editoriales de este numero

La Tabla de Contenidos de Este Número Está Disponible en Español

*(This issue's Table of Contents is available in Spanish)*

Presented in collaboration with the Office of Global Health, UMDNJ-Robert Wood Johnson Medical School

Translation courtesy of

Sergi Casals, M.A.

*Garuna, Medellin, Colombia (www.garunaeditors.com)*

Carlos Lopez Jaramillo, M.D.

*Universidad de Antioquia, Medellin, Colombia*

Javier I. Escobar, M.D., M.Sc.

*UMDNJ-Robert Wood Johnson Medical School*

Consulte *The American Journal of Psychiatry* en línea en [ajp.psychiatryonline.org](http://ajp.psychiatryonline.org)

**NEW**

Also Included: Translations of selected abstracts!

*(Support for this effort provided by AstraZeneca-Colombia.)*

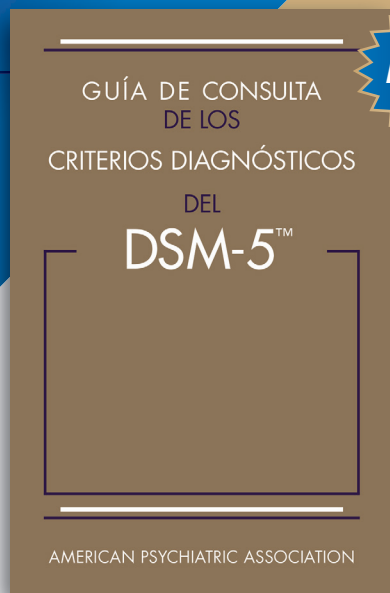

**Nuevo!**

## Guía de consulta de los criterios diagnósticos del DSM-5™

**Spanish Edition of the Desk Reference to the Diagnostic Criteria From DSM-5™**

American Psychiatric Association

La Guía de consulta de los criterios diagnósticos del DSM-5™ es una ayuda concisa y asequible para la referencia psiquiátrica fundamental, el DSM-5™. Incluye la clasificación diagnóstica completa revisada, así como todos los criterios diagnósticos del DSM-5™ en un formato fácil de utilizar. Esta cómoda referencia proporciona un acceso rápido a la información esencial para emitir un diagnóstico. Diseñado como complemento del DSM-5™, esta cómoda guía ayudará a los profesionales de la salud mental a incorporar los criterios diagnósticos del DSM-5™ en sus diagnósticos.

El Manual diagnóstico y estadístico de los trastornos mentales es la máxima referencia autorizada para la práctica clínica en el campo de la salud mental. Los cambios estructurales y diagnósticos de la quinta edición son un material que todos los clínicos "deben conocer". La Guía de consulta de los criterios diagnósticos del DSM-5™ condensa la información diagnóstica actualizada esencial de este manual para ofrecer a los clínicos un recurso inestimable para diagnosticar con eficacia los trastornos mentales, desde el de mayor prevalencia al menos frecuente.

2014 • 490 pages • ISBN 978-0-89042-551-0 • Paperback • \$69.00 • Item #2551

*También disponible en Español*

### Aplicación para celular de los Criterios Diagnósticos del DSM-5™

La Aplicación Móvil de Criterios Diagnósticos DSM-5™ proporciona a los profesionales, investigadores y estudiantes de la salud mental un rápido acceso a códigos y criterios vitales de DSM para que puedan integrar por completo los nuevos datos en su práctica y sus estudios. Los usuarios tienen acceso completo fuera de línea a todos los conjuntos de criterios, además de acceso en línea a vídeos, comentarios y recursos de apoyo. Sus poderosas herramientas de personalización y de búsqueda ayudan y mejoran la valoración de las presentaciones de los síntomas en diversos entornos clínicos y administrativos.

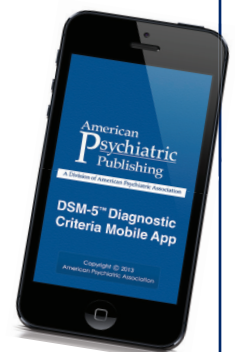

Ahora disponible para dispositivos iOS y Android.

### Síntomas comportamentales y psiquiátricos en las enfermedades priónicas

Andrew Thompson, B.Sc., M.R.C.P.  
Angus MacKay, Ph.D., F.R.C.Psych.  
Peter Rudge, F.R.C.P.  
Ana Lukic, B.Sc., M.R.C.P.  
Marie-Claire Porter, B.Sc., M.R.C.P.  
Jessica Lowe, B.Sc.  
John Collinge, F.R.C.P., F.R.S.  
Simon Mead, Ph.D., F.R.C.P.

Las enfermedades priónicas son enfermedades neurodegenerativas raras que causan síndromes neuropsiquiátricos complejos y altamente variables, a menudo con una progresión notablemente rápida. Se han identificado síntomas psiquiátricos y comportamentales prominentes desde que estas enfermedades se describieron por primera vez. Si bien la investigación sobre estos síntomas en las demencias comunes ha conducido a cambios mayores en el

manejo de estos síntomas, la evidencia para guiar el cuidado de los pacientes con enfermedades priónicas es escasa. Los autores aprovechan sus más de 10 años de experiencia en la Clínica Nacional de Enfermedades Priónicas del Reino Unido (U.K. National Prion Clinic) y revisan las investigaciones publicadas, incluyendo dos estudios prospectivos de investigación clínica en los que se ha hecho seguimiento a más de 300 pacientes con enfermedades priónicas desde el diagnóstico hasta la muerte, y de los que se han recogido datos observacionales detallados sobre la sintomatología y los tratamientos sintomáticos. Los autores agrupan los síntomas comportamentales y psiquiátricos en rasgos psicóticos, rasgos agitados y trastorno del ánimo, y describen la historia natural de los síntomas, demostrando que en muchos pacientes éstos mejoran espontáneamente o se resuelven, y en

muchos otros son breves debido a la rápida progresión del deterioro neurológico. La categoría diagnóstica, la severidad de la enfermedad, la edad, el género y la variación genética son o pueden ser factores predictivos. Los autores revisan los datos sobre observaciones del tratamiento farmacológico de estos síntomas en los estudios clínicos del Reino Unido y hacen recomendaciones prudentes para la práctica clínica. Si bien las medidas no farmacológicas deberían ser las intervenciones de primera línea para estos síntomas, los autores concluyen que el uso sensato de agentes farmacológicos puede ser efectivo para algunos pacientes: antipsicóticos para psicosis severa o agitación; benzodiazepinas, particularmente en los estadios tardíos de la enfermedad; y antidepresivos para trastornos del ánimo.

*(Am J Psychiatry 2014; 171:265-274)*

## Resúmenes y Reseñas

### Desregulación de las emociones en el Trastorno de Déficit de Atención e Hiperactividad

Philip Shaw, M.B.B.Ch., Ph.D.  
Argyris Stringaris, M.D., Ph.D.  
Joel Nigg, Ph.D.  
Ellen Leibenluft, M.D.

Aunque hace ya mucho tiempo se reconoce que muchas personas con trastorno de déficit de atención e hiperactividad (TDAH) también tienen dificultades con la regulación de las emociones, no se ha llegado a ningún consenso sobre cómo conceptualizar este ámbito que representa un reto clínico. Los autores examinan la literatura actual utilizando métodos tanto cuantitativos como cualitativos. Surgen tres hallazgos impor-

tantes. Primero, la desregulación de las emociones es prevalente en TDAH a lo largo de la vida y contribuye de manera importante al deterioro. Segundo, la desregulación de las emociones en TDAH puede surgir de déficits en la orientación hacia los estímulos emocionales, en el reconocimiento de estos estímulos o en la atención que se les presta; estos déficits implican disfunción dentro de la red cortical prefrontal estriato-amígdalina medial. Tercero, si bien los tratamientos actuales de TDAH a menudo también mejoran la desregulación de las emociones, centrarse en esta combinación re-enmarca los interrogantes clínicos y podría estimular nuevos enfoques tera-

péuticos. Los autores entonces consideran tres modelos para explicar el solapamiento entre la desregulación de las emociones y el TDAH: la desregulación de las emociones y el TDAH son dimensiones correlacionadas pero distintas; la desregulación de las emociones es una característica diagnóstica clave del TDAH; y la combinación constituye una entidad nosológica que es distinta tanto del TDAH como de la desregulación por sí sola. Las diferentes predicciones de cada modelo pueden guiar la investigación de la población de pacientes con TDAH y desregulación de las emociones, que ha sido muy descuidada.

*(Am J Psychiatry 2014; 171:276-293)*

## Artículos

## Un ensayo aleatorizado controlado de terapia cognitiva intensiva por siete días y terapia cognitiva semanal estándar para TEPT y terapia de apoyo centrada en las emociones

Anke Ehlers, Ph.D.  
Ann Hackmann, D.Clin.Psy.  
Nick Grey, D.Clin.Psy.  
Jennifer Wild, D.Clin.Psy.  
Sheena Liness, M.A.  
Idit Albert, D.Clin.Psy.  
Alicia Deale, Ph.D.  
Richard Stott, D.Clin.Psy.  
David M. Clark, D.Phil.

**Objetivo:** Los tratamientos psicológicos para el trastorno por estrés post-traumático (TEPT) normalmente se administran una o dos veces a la semana durante varios meses. No está claro si se pueden administrar con éxito por un período de tiempo más corto. Este ensayo clínico tenía dos objetivos: investigar la aceptabilidad y la eficacia de una versión intensiva de 7 días de terapia cognitiva para TEPT e investigar si la terapia cognitiva tiene efectos de tratamiento específicos al comparar la terapia cognitiva intensiva y la semanal estándar con un tratamiento alternativo igualmente confiable.

**Método:** A los pacientes con TEPT crónico (N=121) se les asignó aleatoriamente una terapia cognitiva intensiva de 7 días para el TEPT, 3 meses de terapia cognitiva estándar una vez por semana, 3 meses de terapia de apoyo centrada en las emociones una vez por semana, o estar en una lista de espera de 14 semanas. Los resultados primarios fueron cambios en los síntomas y el diagnóstico de TEPT de acuerdo con las evaluaciones de un asesor independiente y un auto-informe. Los resultados secundarios fueron cambios en discapacidad, ansiedad, depresión y calidad de vida. Se hicieron evaluaciones en la valoración inicial y a las 6 y a las 14 semanas (la evaluación post-tratamiento/espera). A los grupos que recibieron tratamiento, también se les evaluó 3 semanas después de haber iniciado, y se les hicieron valoraciones de seguimiento 27 y 40 semanas después de la aleatorización. En todos los casos se utilizó la estrategia de análisis por intención de tratamiento.

**Resultados:** En la evaluación post-tratamiento/espera, el 73% del grupo de terapia cognitiva intensiva, el 77% del grupo de terapia cognitiva estándar, el 43% del

grupo de terapia de apoyo y el 7% del grupo de la lista de espera se habían recuperado de TEPT. Todos los tratamientos fueron bien tolerados y casi todos los resultados fueron superiores a los que obtuvieron los pacientes en la lista de espera; no se observó ninguna diferencia entre la terapia de apoyo y la lista de espera en cuanto a calidad de vida. Para los objetivos primarios, la incapacidad y la ansiedad general, la terapia cognitiva intensiva y la estándar fueron superiores a la terapia de apoyo. Con la terapia cognitiva intensiva se logró más rápidamente la reducción de síntomas y se obtuvieron resultados generales comparables a los alcanzados con la terapia cognitiva estándar.

**Conclusiones:** La terapia cognitiva para TEPT administrada de forma intensiva por poco más de una semana fue igual de efectiva que la terapia cognitiva administrada durante 3 meses. Ambas tuvieron efectos específicos y fueron superiores a la terapia de apoyo. La terapia cognitiva intensiva para TEPT es una alternativa prometedora y factible al tratamiento semanal tradicional.

(*Am J Psychiatry* 2014; 171:294-304)

## Resultados de un ensayo aleatorizado controlado multicéntrico de la efectividad clínica de la terapia de esquemas para los trastornos de personalidad

Lotte L.M. Bamelis, Ph.D.  
Silvia M.A.A. Evers, Ph.D.  
Philip Spinhoven, Ph.D.  
Arnoud Arntz, Ph.D.

**Objetivo:** Los autores compararon la efectividad de 50 sesiones de terapia de esquemas con la psicoterapia orientada a la clarificación y con el tratamiento habitual en pacientes con trastornos de personalidad del grupo C, paranoide, histriónica o narcisista.

**Método:** Entre 2006 y 2011 se llevó a cabo un ensayo controlado aleatorizado multicéntrico, con un diseño paralelo ciego, en 12 institutos de salud mental holandeses. A un total de 323 pacientes con trastornos de personalidad se les asignó aleatoriamente una de

tres intervenciones: terapia de esquemas (N=147), el tratamiento habitual (N=135) o psicoterapia orientada a la aclaración (N=41). Hubo dos cohortes de terapeutas de terapia de esquemas: a la primera se le capacitó primordialmente por medio de charlas; y la segunda, primordialmente por medio de ejercicios. El resultado primario fue la recuperación del trastorno de personalidad 3 años después de iniciar el tratamiento (evaluado por entrevistadores ciegos al tipo de tratamiento recibido). Los resultados secundarios fueron las tasas de abandono y las medidas de los rasgos de trastornos de personalidad, trastornos depresivos y ansiosos, quejas psicológicas generales, funcionamiento social y general, discrepancia con el auto-ideal, y calidad de vida.

**Resultados:** Una proporción significativamente mayor de pacientes se recuperaron luego de la terapia de esquemas, en comparación con el tratamiento habitual y la psicoterapia orientada a la aclaración. Los terapeutas de esquema de la segunda cohorte obtuvieron mejores resultados que los de la primera cohorte. No hubo diferencias entre la psicoterapia orientada a la aclaración y el tratamiento habitual. Los hallazgos no variaron según diagnósticos de trastornos de personalidad específicos. Con todos los tratamientos se observaron mejoras en los resultados secundarios. Los pacientes de terapia de esquemas tuvieron menos trastornos depresivos y mejor funcionamiento general y social en el seguimiento. Si bien las medidas basadas en la entrevista demostraron dife-

rencias significativas entre tratamientos, no se encontraron este tipo de diferencias con las medidas de auto-reporte.

**Conclusiones:** La terapia de esquemas fue superior al tratamiento habitual en cuanto a la recuperación, a otros resultados basados en la entrevista y al aban-

dono. La capacitación en terapia de esquemas basada en ejercicios fue superior a la capacitación basada en charlas. (*Am J Psychiatry* 2014; 171:305-322)

## Fluoxetina administrada a monos juveniles: efectos sobre el comportamiento y el transportador de serotonina

Stal Saurav Shrestha, B.A.  
Eric E. Nelson, Ph.D.  
Jehi-San Liow, Ph.D.  
Robert Gladding, B.S.  
Chul Hyoung Lyoo, M.D., Ph.D.  
Pam L. Noble, M.S.  
Cheryl Morse, M.S.  
Ioline D. Henter, M.A.  
Jeremy Kruger, B.S.  
Bo Zhang, Ph.D.  
Stephen J. Suomi, Ph.D.  
Per Svenningsson, M.D., Ph.D.  
Victor W. Pike, Ph.D.  
James T. Winslow, Ph.D.  
Ellen Leibenluft, M.D.  
Daniel S. Pine, M.D.  
Robert B. Innis, M.D., Ph.D.

**Objetivo:** Este estudio examinó los efectos a largo plazo de la fluoxetina administrada a monos rhesus juveniles que, como adultos jóvenes, se estudiaron

con resonancia magnética y tomografía por emisión de positrones para dos marcadores serotoninérgicos: el transportador de serotonina (SERT) y el receptor de serotonina 1A (5-HT1A). También se estudió un número igual de monos separados de sus madres al nacer—un modelo animal de estrés humano en la infancia.

**Método:** Al nacer, 32 monos rhesus machos fueron asignados de forma aleatoria a la separación materna o a las condiciones de cría normales. Después de 2 años, a la mitad (N=8) de cada grupo se le asignó aleatoriamente fluoxetina (3 mg/kg) o placebo por 1 año. Para eliminar los efectos de confusión de la droga residual en el cerebro, se les hizo un escáner a los monos como mínimo un año y medio después de haber descontinuado la droga. Las interacciones sociales se evaluaron tanto durante como después de la administración de la droga.

**Resultados:** La fluoxetina aumentó persistentemente el SERT, pero no los re-

ceptores 5-HT1A, tanto en el neocórtex como en el hipocampo. El análisis basado en vóxel del cerebro completo reveló que la fluoxetina tuvo un efecto significativo en las cortezas lateral temporal y cingulada. En contraste, ni la separación materna por sí misma ni la interacción entre crianza y drogas fueron significativas para ninguno de los marcadores. La fluoxetina no tuvo ningún efecto significativo en las medidas comportamentales.

**Conclusiones:** La fluoxetina administrada a los monos juveniles les aumenta el SERT hasta que alcanzan la edad adulta. Las implicaciones referentes a la eficacia o a los potenciales efectos adversos de los ISRS en los pacientes no se pueden derivar directamente de este estudio. Su objetivo era investigar los efectos de los ISRS en el desarrollo del cerebro en primates no humanos utilizando un enfoque experimental que asignara aleatoriamente un tratamiento con ISRS a largo plazo o placebo.

(*Am J Psychiatry* 2014; 171:323-331)

## Asociación de la violencia con la aparición de ideas delirantes persecutorias en esquizofrenia no tratada

Robert Keers, Ph.D.  
Simone Ullrich, Ph.D.  
Bianca L. DeStavola, Ph.D.  
Jeremy W. Coid, M.D.

**Objetivo:** La psicosis es considerada un factor de riesgo importante para la violencia, pero los estudios muestran resultados inconsistentes. El mecanismo a través del cual los trastornos psicóticos influyen la violencia también sigue siendo incierto. Los autores investigaron el riesgo de comportamiento violento entre prisioneros puestos en libertad y si el tratamiento reducía este riesgo. También estudiaron si los síntomas activos de psicosis en el momento del comportamiento violento explicaban las asociaciones entre la psicosis no tratada y la violencia.

**Método:** El Estudio de Cohortes de Prisioneros del Reino Unido es un estudio

longitudinal prospectivo de prisioneros a quien se les hizo seguimiento una vez puestos en libertad. Hombres y mujeres delincuentes cumpliendo sentencias de 2 o más años por un delito sexual o violento fueron clasificados en cuatro grupos: sin ninguna psicosis (N=742), con esquizofrenia (N=94), con trastorno delirante (N=29) y con psicosis inducida por drogas (N=102). Los síntomas de psicosis, incluyendo alucinaciones, inserción de pensamientos, experiencias extrañas e ideas delirantes de persecución, se evaluaron antes y después de ser puestos en libertad. La información sobre violencia entre el momento de ponerlos en libertad y el seguimiento se obtuvo por medio de auto-informes y registros policiales.

**Resultados:** La esquizofrenia se asoció a la violencia pero sólo en la ausencia de tratamiento (odds ratio=3,76; 95% CI=1,39-10,19). La esquizofrenia

no tratada se asoció con la aparición, durante el seguimiento, de ideas delirantes persecutorias (odds ratio=3,52; IC 95%=1,18-10,52), que se asociaron con la violencia (odds ratio=3,68; IC 95%=2,44-5,55). Los efectos mediadores de las ideas delirantes persecutorias fueron confirmados en análisis de mediación ( $\beta=0,02$ ; IC 95%=0,01-0,04).

**Conclusiones:** Los resultados indican que la aparición de ideas delirantes persecutorias en la esquizofrenia no tratada explica el comportamiento violento. Mantener el tratamiento psiquiátrico en los prisioneros con esquizofrenia una vez han salido en libertad puede reducir substancialmente su reincidencia. La mejor detección de síntomas y el tratamiento de prisioneros son por lo tanto dos aspectos esenciales para prevenir la violencia.

(*Am J Psychiatry* 2014; 171:332-339)

## Mega-análisis multicéntrico con morfometría basada en vóxel de escanografías cerebrales estructurales en trastorno obsesivo compulsivo

Stella J. de Wit, M.D.  
 Pino Alonso, M.D., Ph.D.  
 Lizanne Schweren, M.Sc.  
 David Mataix-Cols, Ph.D.  
 Christine Lochner, Ph.D.  
 José M. Menchón, M.D., Ph.D.  
 Dan J. Stein, M.D., Ph.D.  
 Jean-Paul Fouché, M.Sc.  
 Carles Soriano-Mas, Ph.D.  
 Joao R. Sato, Ph.D.  
 Marcelo Q. Hoexter, M.D., Ph.D.  
 Damiaan Denys, M.D., Ph.D.  
 Takashi Nakamae, M.D., Ph.D.  
 Seiji Nishida, M.D., Ph.D.  
 Jun Soo Kwon, M.D., Ph.D.  
 Joon Hwan Jang, M.D., Ph.D.  
 Geraldo F. Busatto, M.D., Ph.D.  
 Narcís Cardoner, M.D., Ph.D.  
 Danielle C. Cath, M.D., Ph.D.  
 Kenji Fukui, M.D., Ph.D.  
 Wi Hoon Jung, Ph.D.  
 Sung Nyun Kim, M.D.  
 Euripides C. Miguel, M.D., Ph.D.  
 Jin Narumoto, M.D., Ph.D.  
 Mary L. Phillips, M.D., Ph.D.  
 Jesus Pujol, M.D., Ph.D.  
 Peter L. Remijnse, M.D., Ph.D.  
 Yuki Sakai, M.D., Ph.D.  
 Na Young Shin, M.A.

Kei Yamada, M.D., Ph.D.  
 Dick J. Veltman, M.D., Ph.D.  
 Odile A. van den Heuvel, M.D., Ph.D.

**Objetivo:** Los resultados de estudios de neuroimágenes del trastorno obsesivo-compulsivo (TOC) han sido solo parcialmente consistentes. Los autores buscaron evaluar diferencias volumétricas regionales en sustancia blanca y gris en muestras grandes de pacientes con TOC y sujetos sanos de comparación y su relación con variables demográficas y clínicas.

**Método:** Se llevó a cabo un mega-análisis multicéntrico con morfometría basada en vóxel de resonancias magnéticas estructurales ponderadas en T1 con un escáner de 1,5 Tesla, obtenidas del Consorcio de Imágenes Cerebrales de TOC (OCD Brain Imaging Consortium). Los volúmenes regionales de sustancia gris y blanca se compararon en 412 pacientes adultos con TOC y 386 sujetos sanos.

**Resultados:** En relación a los sujetos sanos de comparación, los pacientes con TOC tuvieron volúmenes de sustancia gris y blanca frontales significativamente inferiores bilateralmente, incluyendo la corteza prefrontal dorso-medial, la corteza cingulada anterior y el giro frontal inferior extendiéndose a la ínsula anterior. En los pacientes tam-

bién se observó un mayor volumen de sustancia gris cerebelosa bilateralmente en comparación con los sujetos sanos. Las diferencias entre grupos en cuanto al volumen de sustancia gris y blanca fueron significativas después de la corrección por comparaciones múltiples. Adicionalmente, se observaron interacciones entre grupo y edad en el putamen, la ínsula y la corteza orbitofrontal (que indicaban preservación relativa del volumen en los pacientes en comparación con los sujetos con el aumento de la edad) y en la corteza temporal bilateralmente (que indicaban una pérdida relativa de volumen en los pacientes en comparación con los sujetos sanos con el aumento de la edad).

**Conclusiones:** Estos hallazgos sustentan parcialmente los modelos frontoestriatales prevalentes del TOC y ofrecen nuevos datos sobre la neuroanatomía del trastorno que no se podían derivar de estudios anteriores más pequeños. Los efectos de la interacción entre grupo y edad en las regiones cerebrales orbitofrontal-estriatal y (para)límbica pueden ser el resultado de neuroplasticidad alterada asociada con comportamientos compulsivos crónicos, ansiedad o procesos compensatorios relacionados con la disfunción cognitiva.

(*Am J Psychiatry* 2014; 171:340-349)

## Revisión de datos de ligamiento en esquizofrenia en el banco de datos del NIMH: Re-análisis de datos regularizados de múltiples estudios

Veronica J. Vieland, Ph.D.  
 Kimberly A. Walters, Ph.D.  
 Thomas Lehner, Ph.D.  
 Marco Azaro, Ph.D.  
 Kathleen Tobin, Ph.D.  
 Yungui Huang, Ph.D.  
 Linda M. Brzustowicz, M.D.

**Objetivo:** El proyecto Análisis Combinado de Estudios Psiquiátricos (CAPS, por sus siglas en inglés) realizó una revisión exhaustiva y una regularización de estudios sobre todos los datos de ligamiento en esquizofrenia disponibles en 2011 en el Centro de Estudios Genómicos Colaborativos sobre Trastornos mentales, conocido también como la Iniciativa en Genética Humana (HGI, Human Genetics Initiative) y financiado por el Instituto Norteamericano de Salud Mental (NIMH). Los autores re-analizaron los datos utilizando métodos estadísticos

diseñados para la acumulación de evidencia de múltiples conjuntos de datos potencialmente heterogéneos.

**Método:** Los datos se subdividieron de acuerdo al estudio, el mayor grupo de población y la presencia o ausencia dentro de familias de esquizofrenia con un componente afectivo substancial. El marco estadístico de la probabilidad a posteriori de ligamiento (PPL, por sus siglas en inglés) se utilizó para actualizar secuencialmente evidencia de ligamiento en estos subconjuntos de datos (resultados globales)

**Resultados:** Si bien algunos sitios (loci) previamente implicados, según los datos de HGI, también se identificaron en el actual análisis global (2q36.1, 15q23), otros no fueron identificados. Se encontraron varios sitios que anteriormente no se habían reportado en las muestras del HGI pero para los que existe evidencia de estudios independientes de aso-

ciación o ligamiento (3q28, 12q23.1, 11p11.2, Xq26.1) Como era de esperar, se vieron diferencias entre los grupos de población. Son de especial interés las señales en 11p15.3, 11p11.2 y Xq26.1, para los cuales los datos de familias con un componente afectivo substancial sustentan el ligamiento; en contraste, los datos de las familias restantes ofrecen evidencia en contra del ligamiento. Estos tres sitios coinciden con sitios reportados en estudios independientes de trastorno bipolar o muestras mixtas de trastorno bipolar-esquizofrenia.

**Conclusiones:** Los bancos de datos públicos brindan la oportunidad de aprovechar conjuntos de datos multicéntricos para estudiar trastornos complejos. El análisis con un método estadístico diseñado específicamente para datos de este tipo nos permite extraer nueva información de datos existentes.

(*Am J Psychiatry* 2014; 171:350-359)

## Ensayo aleatorizado de un registro personal de salud electrónico para pacientes con enfermedades mentales graves

Benjamin G. Druss, M.D., M.P.H.  
Xu Ji, M.S.P.H.  
Gretl Glick, B.A.  
Silke A. von Esenwein, Ph.D.

**Objetivo:** Los autores evaluaron el efecto que un registro de salud personal electrónico tiene en la calidad de la atención médica en un contexto de salud mental comunitaria.

**Método:** A un total de 170 personas con un trastorno mental grave y una enfermedad comórbida que recibían tratamiento en un centro de salud mental comunitario, se les asignó aleatoriamente o bien un registro personal de salud, o bien la atención habitual. Los resultados son las evaluaciones, al cabo

de un año, de la calidad de la atención médica, la activación del paciente, el uso del servicio y la calidad de vida con relación a la salud.

**Resultados:** Los pacientes utilizaron el registro personal de salud una media de 42,1 veces durante el período de intervención de 1 año. En el grupo del registro personal de salud, la proporción total de posibles servicios de prevención recibidos aumentó del 24% al inicio del estudio hasta el 40% en el mes 12 de seguimiento, mientras que en el grupo de atención habitual, disminuyó del 25% al 18%. En el subconjunto de pacientes con una o más enfermedades cardiometabólicas (N=118), la proporción total de posibles servicios recibidos mejoró 2 puntos porcentuales en el grupo del reg-

istro personal de salud y disminuyó 11 puntos porcentuales en el grupo de atención habitual. Se registró un aumento en el número de visitas médicas de pacientes externos, lo que pareció explicar muchas de las diferencias significativas en la calidad de la atención médica.

**Conclusiones:** Tener un registro personal de salud tuvo como resultado una mejor calidad de la atención médica y un mayor uso de los servicios médicos entre los pacientes. Los registros personales de salud podrían ofrecer una estrategia escalable relativamente económica para mejorar la atención médica para los pacientes con trastornos mentales graves y enfermedades comórbidas.

(*Am J Psychiatry* 2014; 171:360–368)
